# Supplementary material for: Mixed strain pathogen populations accelerate the evolution of antibiotic resistance in patients
Source: PubMed Central journal article supplement (PMC10338428; doi:10.1038/s41467-023-39416-2), 2023-07-12
Supplement: 41467_2023_39416_MOESM1_ESM.pdf [file 41467_2023_39416_MOESM1_ESM.pdf]

Supplementary Materials for

**Mixed strain pathogen populations accelerate the evolution of antibiotic resistance in patients**

**Supplementary Table 1. Comparison of *P. aeruginosa* positivity in first enrolment sample between single and mixed strain patients.**

| Patient | Mixed or single strain? | First enrolment sample <i>P. aeruginosa</i> positive? |
|---------|-------------------------|-------------------------------------------------------|
| 1       | Single strain           | Negative                                              |
| 3       | Single strain           | Positive                                              |
| 4       | Single strain           | Positive                                              |
| 5       | Single strain           | Positive                                              |
| 6       | Single strain           | Positive                                              |
| 7       | Single strain           | Positive                                              |
| 12      | Single strain           | Positive                                              |
| 13      | Single strain           | Negative                                              |
| 19      | Single strain           | Negative                                              |
| 21      | Single strain           | Negative                                              |
| 22      | Single strain           | Negative                                              |
| 23      | Single strain           | Negative                                              |
| 24      | Single strain           | Negative                                              |
| 25      | Single strain           | Negative                                              |
| 26      | Single strain           | Negative                                              |
| 27      | Single strain           | Positive                                              |
| 29      | Single strain           | Positive                                              |
| 30      | Single strain           | Positive                                              |
| 31      | Single strain           | Negative                                              |
| 32      | Single strain           | Positive                                              |
| 33      | Single strain           | Positive                                              |
| 34      | Single strain           | Negative                                              |
| 35      | Single strain           | Positive                                              |
| 2       | Mixed strain            | Negative                                              |
| 8       | Mixed strain            | Positive                                              |
| 9       | Mixed strain            | Negative                                              |
| 10      | Mixed strain            | Positive                                              |
| 11      | Mixed strain            | Negative                                              |
| 14      | Mixed strain            | Negative                                              |
| 15      | Mixed strain            | Negative                                              |
| 16      | Mixed strain            | Positive                                              |
| 17      | Mixed strain            | Negative                                              |
| 18      | Mixed strain            | Positive                                              |
| 20      | Mixed strain            | Positive                                              |
| 28      | Mixed strain            | Positive                                              |

The first enrolment was *P. aeruginosa* positive in a total of 12/23 (52.17%) single strain patients and 6/12 (50.00%) mixed strain patients. Whether first enrolment sample was *P. aeruginosa* positive did not differ significantly between single strain and mixed strain patients (unpaired two tailed t-test; p=0.9073).

**Supplementary Table 2: Time (days) between first and last sample for antibiotic-treated single strain and mixed strain patients.**

| Patient number | Mixed or single strain? | Time (days) between first and last sample |
|----------------|-------------------------|-------------------------------------------|
| 8              | Mixed strain            | 4                                         |
| 15             | Mixed strain            | 7                                         |
| 17             | Mixed strain            | 4                                         |
| 10             | Mixed strain            | 7                                         |
| 16             | Mixed strain            | 20                                        |
| 18             | Mixed strain            | 16                                        |
| 29             | Single strain           | 7                                         |
| 32             | Single strain           | 4                                         |
| 34             | Single strain           | 4                                         |
| 6              | Single strain           | 21                                        |
| 35             | Single strain           | 22                                        |
| 5              | Single strain           | 30                                        |
| 4              | Single strain           | 14                                        |

Time (days) between first and last sample did not differ significantly between antibiotic-treated single and mixed strain patients (unpaired two tailed t-test;  $p=0.3211$ ).

**Supplementary Table 3: ANOVA testing responses to antibiotic treatment.**

Response variable:  $P_{R(F),x} - P_{R(I),x}$  where  $P_{R(F),x}$  is the proportion of isolates resistant from patient  $y$  to antibiotic  $x$  at the final time point and  $P_{R(I),x}$  is the proportion of isolates from patient  $y$  resistant to antibiotic  $x$  at the initial time point

Pathogen diversity: A categorical variable reflecting patients that were colonized by single strain and mixed strain populations.

Patient: We nested patient within pathogen diversity as patients were colonized by either a single strain or mixed strain population of *Pseudomonas*.

Antibiotic: Resistance was measured to six different antibiotics (meropenem, ceftazidime, gentamicin, ciprofloxacin, aztreonam, tazobactam)

Initial Resistance:  $P_{R(I),x}$  is the proportion of isolates from patient  $y$  resistant to antibiotic  $x$  at the initial time point

Response type: A binary variable reflecting whether or not antibiotics were used to treat a given patient during the sampling interval (ie direct responses) or not (collateral responses)

**A) Full model**

| Term                                  | DF | SS    | F     | P      |
|---------------------------------------|----|-------|-------|--------|
| Pathogen diversity                    | 1  | 8456  | 15.03 | .0003  |
| Patient [Pathogen diversity]          | 11 | 24244 | 3.91  | .0004  |
| Antibiotic                            | 5  | 2391  | .85   | .52    |
| Initial resistance                    | 1  | 17391 | 30.9  | <.0001 |
| Response type                         | 1  | 16.13 | .029  | .866   |
| Initial resistance*pathogen diversity | 1  | 9.98  | .0177 | .894   |
| Initial resistance*Antibiotic         | 5  | 2515  | .894  | .49    |
| Error                                 | 52 | 29253 |       |        |

**B) Reduced model – constructed by sequentially removing non-significant terms, beginning with interaction terms.**

| Term                         | DF | SS    | F     | P      |
|------------------------------|----|-------|-------|--------|
| Pathogen diversity           | 1  | 8393  | 15.98 | .0002  |
| Patient [Pathogen diversity] | 11 | 28919 | 5.00  | <.0001 |
| Initial resistance           | 1  | 17180 | 32.70 | <.0001 |
| Error                        | 64 | 33626 |       |        |

**C) Full model excluding the data from patient 8**

| Term                                  | DF | SS    | F     | P      |
|---------------------------------------|----|-------|-------|--------|
| Pathogen diversity                    | 1  | 6505  | 12.17 | .0011  |
| Patient [Pathogen diversity]          | 10 | 24365 | 4.55  | .0002  |
| Antibiotic                            | 5  | 1727  | .64   | .66    |
| Initial resistance                    | 1  | 16910 | 31.6  | <.0001 |
| Response type                         | 1  | 24.47 | .045  | .83    |
| Initial resistance*pathogen diversity | 1  | 24.76 | .046  | .83    |
| Initial resistance*Antibiotic         | 5  | 4202  | 1.57  | .18    |
| Error                                 | 47 | 25121 |       |        |

**Supplementary Table 4:** Summary of negative binomial regression models for the number of *de novo* variants detected. Coefficients and p-values (two-sided Wald test) are given for resistance variants (a) and other variants (b), including rerunning analysis with an outlier which did not change the overall conclusion (c, d).

| <b>(a) glm.nb(resistance.variants ~ infection.type*isolate.count)</b> | Estimate       | Std. Error     | z value        | Pr(> z )       |
|-----------------------------------------------------------------------|----------------|----------------|----------------|----------------|
| (Intercept)                                                           | 2.87155<br>01  | 0.95946<br>467 | 2.99286<br>69  | 0.00276<br>37  |
| Infection.type (mixed vs. single)                                     | 2.26900<br>02  | 2.28450<br>297 | 0.99321<br>39  | 0.32060<br>572 |
| Isolate.count (no. of isolates)                                       | 0.13180<br>623 | 0.05133<br>518 | 2.56756<br>165 | 0.01024<br>166 |
| Interaction between infection type and no. of isolates                | 0.04884<br>186 | 0.10804<br>483 | 0.45205<br>175 | 0.65123<br>17  |

| <b>(b) glm.nb(nonresistance.variants ~ infection.type*isolate.count)</b> | Estimate       | Std. Error     | z value        | Pr(> z )       |
|--------------------------------------------------------------------------|----------------|----------------|----------------|----------------|
| (Intercept)                                                              | 0.42021<br>8   | 0.44753<br>492 | 0.93896<br>13  | 0.34775<br>063 |
| Infection.type (mixed vs. single)                                        | 0.52385<br>72  | 0.57749<br>448 | 0.90712<br>06  | 0.36434<br>3   |
| Isolate.count (no. of isolates)                                          | 0.12915<br>218 | 0.03094<br>087 | 4.17416<br>147 | 2.99E-<br>05   |
| Interaction between infection type and no. of isolates                   | 0.00666        | 0.04064<br>429 | 0.16386        | 0.86984<br>136 |

| <b>(c) With 25-0925 outlier: glm.nb(resistance.variants ~ infection.type*isolate.count)</b> | Estimate      | Std. Error     | z value        | Pr(> z )       |
|---------------------------------------------------------------------------------------------|---------------|----------------|----------------|----------------|
| (Intercept)                                                                                 | 3.36122<br>27 | 1.02884<br>311 | 3.26699<br>25  | 0.00108<br>697 |
| Infection.type (mixed vs. single)                                                           | 1.78746<br>35 | 2.33750<br>836 | 0.76468<br>76  | 0.44445<br>762 |
| Infection.type (mixed vs. single)                                                           | 0.18347<br>49 | 0.05340<br>47  | 3.43555<br>715 | 0.00059<br>134 |
| Interaction between infection type and no. of isolates                                      | 0.00168<br>54 | 0.11209<br>265 | 0.01503<br>59  | 0.98800<br>352 |

| <b>(d) With 25-0925 outlier: glm.nb(nonresistance.variants ~ infection.type*isolate.count)</b> | Estimate       | Std. Error     | z value        | Pr(> z )       |
|------------------------------------------------------------------------------------------------|----------------|----------------|----------------|----------------|
| (Intercept)                                                                                    | 0.28289<br>04  | 0.45670<br>829 | 0.61941<br>17  | 0.53564<br>52  |
| Infection.type (mixed vs. single)                                                              | 0.68521<br>73  | 0.59202<br>829 | 1.15740<br>63  | 0.24710<br>641 |
| Isolate.count (no. of isolates)                                                                | 0.11354<br>428 | 0.03077<br>403 | 3.68961<br>384 | 0.00022<br>459 |
| Interaction between infection type and no. of isolates                                         | 0.01143<br>137 | 0.04144<br>573 | 0.27581<br>529 | 0.78268<br>994 |

**Supplementary Table 5: ANOVA testing for a trade-off between growth rate and resistance.**

Response variable: Growth rate, the mean growth rate of 8-10 (check) replicate cultures of each isolate in culture medium

Pathogen diversity: A categorical variable reflecting isolates from patients that were colonized by single strain or mixed strain populations.

Resistance phenotype: A categorical variable reflecting isolates that were MDR (resistant to 3 or more antibiotics) or non-MDR (resistant to 0-2 antibiotics)

Patient: We nested patient within pathogen diversity as patients were colonized by either a single strain or mixed strain population of Pseudomonas.

| <b>Term</b>                             | <b>DF</b> | <b>SS</b> | <b>F</b> | <b>P</b> |
|-----------------------------------------|-----------|-----------|----------|----------|
| Pathogen diversity                      | 1         | .062      | .126     | .72      |
| Resistance phenotype                    | 1         | 2.66      | 5.42     | .021     |
| Pathogen diversity*Resistance phenotype | 1         | 5.52      | 11.24    | .0010    |
| Patient [Pathogen diversity]            | 8         | 14.4      | 3.66     | .0006    |
| Error                                   | 167       | 82        |          |          |

**Supplementary Table 6: Characteristics of study cohort.**

|                                     |                | Included, n (%) |
|-------------------------------------|----------------|-----------------|
|                                     |                | (n = 35)        |
| Female sex                          |                | 13 (36.1)       |
| Age                                 | (median, IQR)  | 63 (49-72)      |
| APACHE IV score<br>at ICU admission | (median, IQR)  | 45 (34-68)      |
| Body Mass Index, BMI                | (median, IQR)  | 23 (26-31)      |
| ICU admission specialty             | Medical        | 15 (42.9)       |
|                                     | Surgery/trauma | 20 (57.1)       |
| Origin prior to ICU                 | Home/community | 16 (45.7)       |
|                                     | Healthcare     | 19 (54.3)       |
| Prior antibiotic use                |                | 10 (27.8)       |
| Diabetes                            |                | 6 (17.1)        |
| European region                     | North          | 3 (8.6)         |
|                                     | South          | 24 (68.6)       |
|                                     | East           | 3 (8.6)         |
|                                     | West           | 5 (14.3)        |

Supplementary Figure 1: Rarefaction analysis of mixed strain patient samples, showing the proportion of subsamples that contain at least 2 strains as sample size increase.

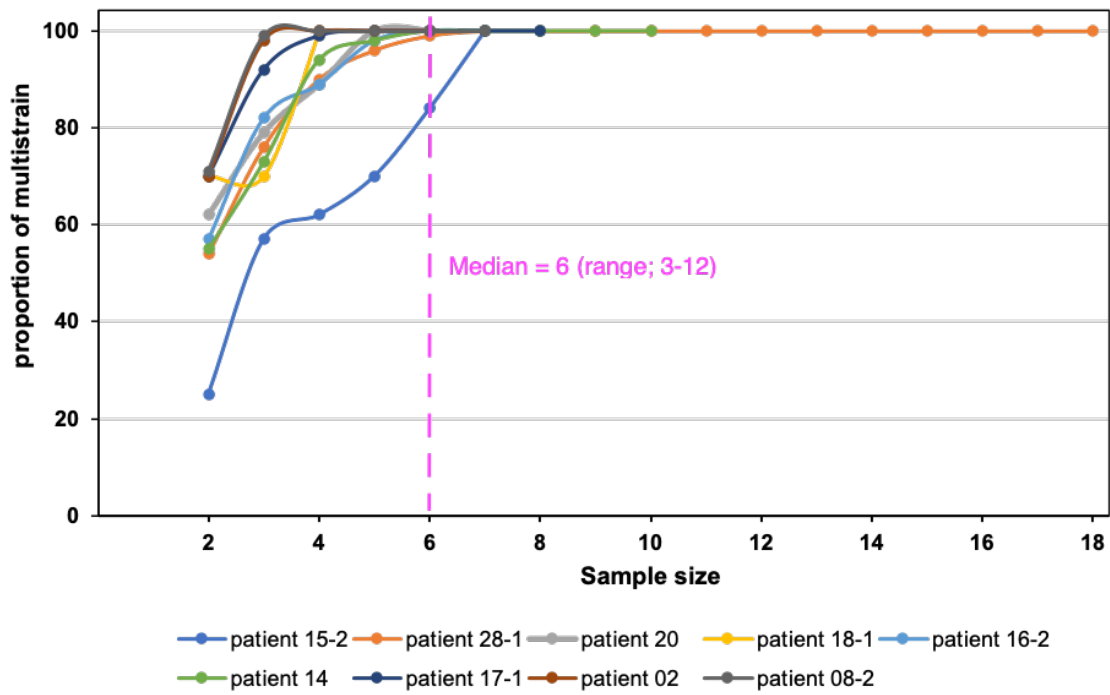

The median sample size of the single strain patient samples was 6 isolates, with a range between 3 and 12.



**Supplementary Figure 2: Genetic diversity of isolates recovered from patient 15.**

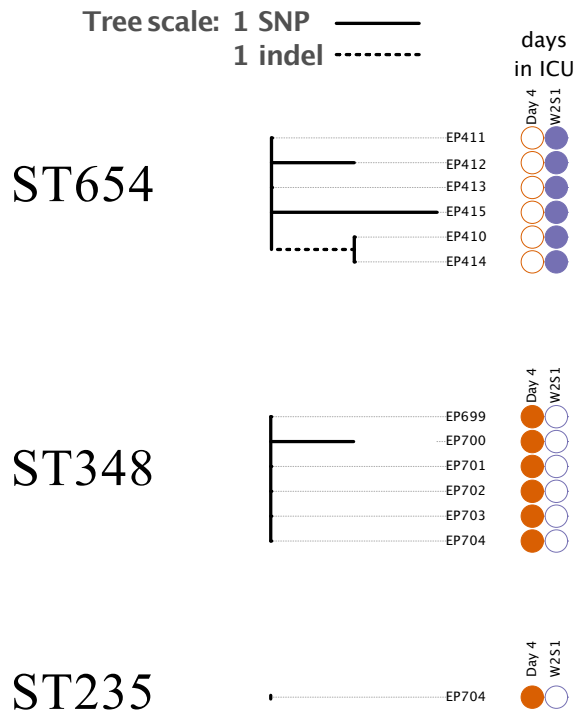

Phylogenetic reconstruction of ST654, ST348 and ST235 isolates from patient 15 indicating SNPs and indels.
